# Supplementary material for: Genome-Wide Investigation Reveals Potential Therapeutic Targets in Shigella spp.
Source: Hindawi journal article supplement (doi:10.1155/2024/5554208), 2024-03-21
Supplement: f1 [file 5554208.f1.pdf]

## Supplementary File

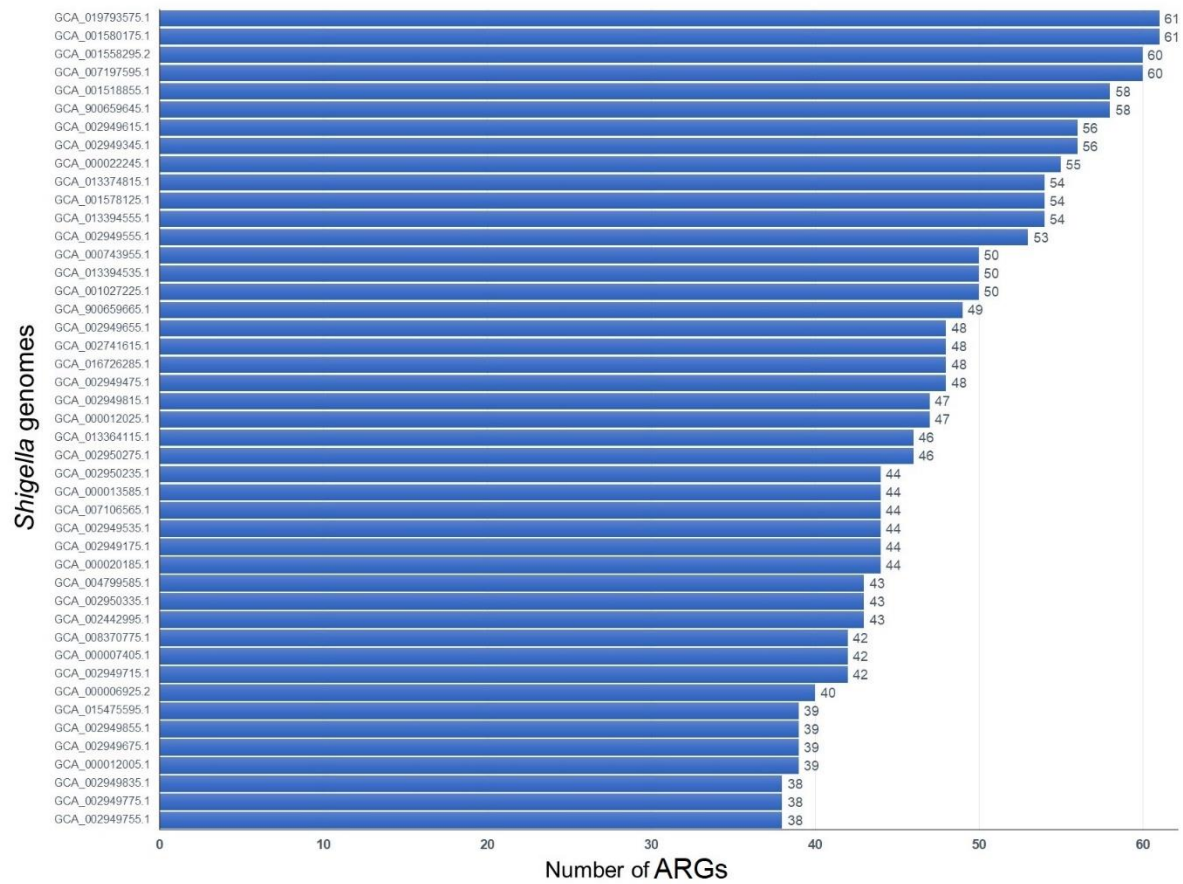

**Figure S1.** Number of antibiotic resistance genes (ARGs) detected in the genomes of the *Shigella* spp. strains. The X-axis represents the number of ARGs and Y-axis shows the name of the isolates of the corresponding *Shigella* genomes.

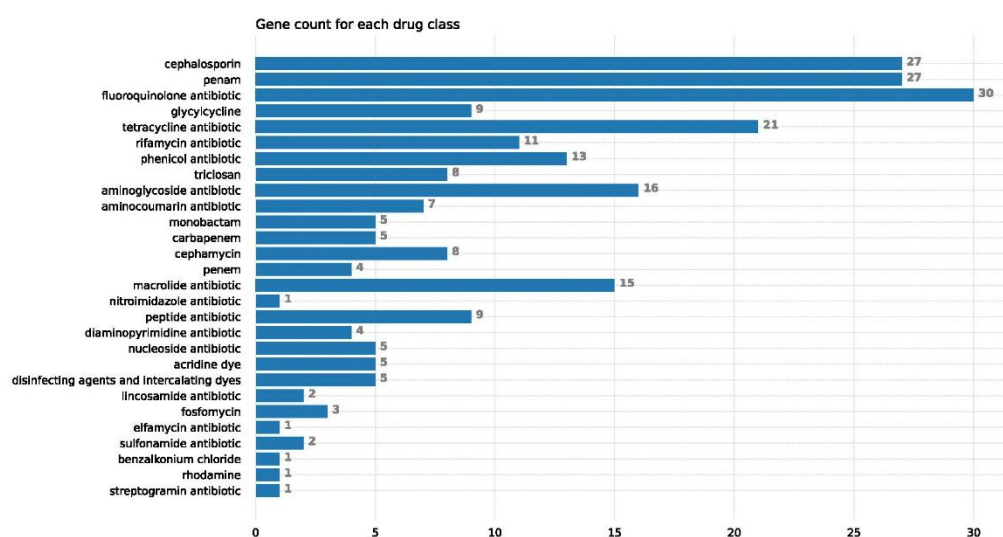

**Figure S2.** Antibiotic resistance gene (ARG) counts against different drug classes detected in the genomes of four *Shigella* species. The X-axis represents ARG counts and Y-axis shows the different drug classes.

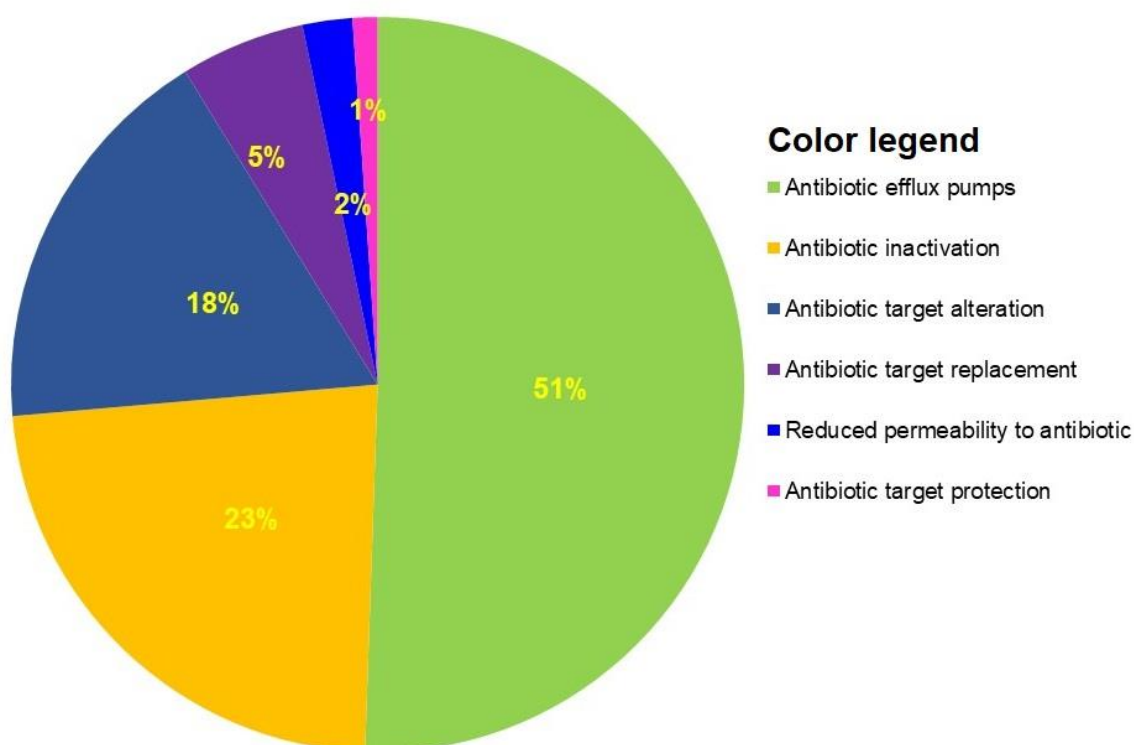

**Figure S3.** Different antibiotic resistance mechanisms showed by *Shigella* spp.

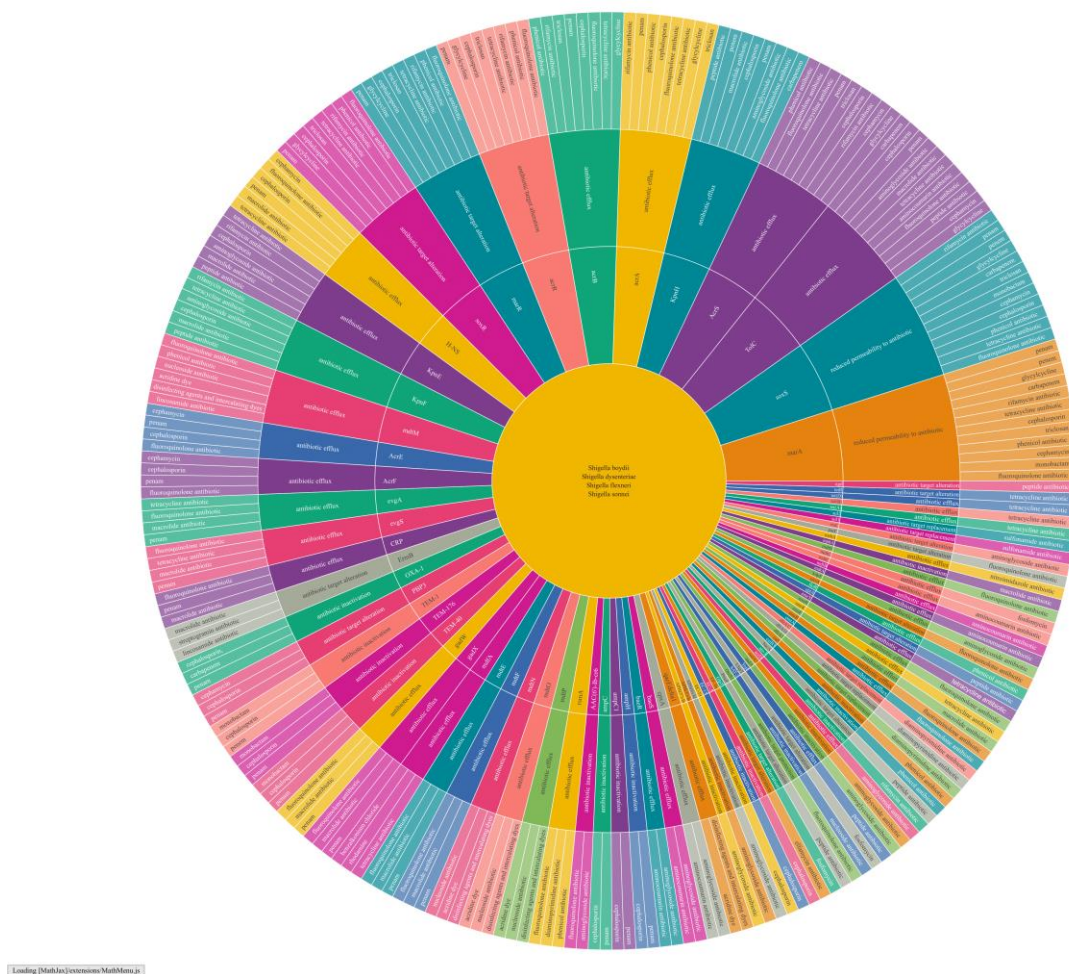

**Figure S4.** Sun burst plot showing 91 shared ARGs, antibiotics, drug classes, and their mechanisms in 45 genomes of *Shigella*.

**Table S1.** Study genomes information.

| Sl. No | Accession No.   | <i>Shigella</i> spp.  | Country of origin | Genome coverage | Genome size (Mb) | Host/Sample | Source           | Number of gene | Reference        |
|--------|-----------------|-----------------------|-------------------|-----------------|------------------|-------------|------------------|----------------|------------------|
| 1      | GCA_000006925.2 | <i>S. flexneri</i>    | China             | Not provided    | 4.829            | Human/Stool | Hospital patient | 4,788          | NCBI:txid198214  |
| 2      | GCA_000007405.1 |                       | USA               | Not provided    | 4.599            | Human/Stool | Hospital patient | 4,618          | NCBI:txid198215  |
| 3      | GCA_000013585.1 |                       | China             | Not provided    | 4.574            | Human/Stool | Hospital patient | 4,609          | NCBI:txid373384  |
| 4      | GCA_000022245.1 |                       | China             | Not provided    | 4.894            | Human/Stool | Hospital patient | 4,984          | NCBI:txid591020  |
| 5      | GCA_000743955.1 |                       | China             | Not provided    | 4.596            | Human/Stool | Hospital patient | 4,635          | NCBI:txid1282357 |
| 6      | GCA_001578125.1 |                       | China             | 164.55          | 4.853            | Human/Stool | Hospital patient | 4,978          | NCBI:txid374923  |
| 7      | GCA_001580175.1 |                       | China             | 58x             | 4.892            | Human/Stool | Hospital patient | 4,980          | NCBI:txid42897   |
| 8      | GCA_002442995.1 |                       | Australia         | 203.0x          | 4.817            | Human/Stool | Hospital patient | 4,910          | NCBI:txid1935181 |
| 9      | GCA_002950235.1 |                       | Tanzania          | 127.0x          | 4.691            | Human/Stool | Hospital patient | 4,763          | NCBI:txid623     |
| 10     | GCA_002950335.1 |                       | Tanzania          | 135.0x          | 4.646            | Human/Stool | Hospital patient | 4,710          | NCBI:txid623     |
| 11     | GCA_004799585.1 |                       | Sweden            | 155.0x          | 4.829            | Human/Stool | Hospital patient | 4,917          | NCBI:txid1086030 |
| 12     | GCA_007197595.1 |                       | South Korea       | 166.0x          | 5.127            | Human/Stool | Hospital patient | 5,015          | NCBI:txid623     |
| 13     | GCA_008370775.1 |                       | USA               | 30.0x           | 4.599            | Human/Stool | Hospital patient | 4,626          | NCBI:txid424720  |
| 14     | GCA_013364115.1 |                       | USA               | 846.51x         | 4.544            | Human/Stool | Hospital patient | 4,564          | NCBI:txid623     |
| 15     | GCA_019793575.1 |                       | China             | 400.0x          | 4.834            | Human/Stool | Hospital patient | 4,635          | NCBI:txid623     |
| 16     | GCA_900659665.1 |                       | Australia         | 225x            | 4.944            | Human/Stool | Hospital patient | 5,047          | NCBI:txid623     |
| 17     | GCA_900659645.1 |                       | Australia         | 181x            | 4.616            | Human/Stool | Hospital patient | 4,675          | NCBI:txid623     |
| 18     | GCA_000012005.1 | <i>S. dysenteriae</i> | China             | Not provided    | 4.561            | Human/Stool | Hospital patient | 4,840          | NCBI:txid300267  |
| 19     | GCA_002741615.1 |                       | Tanzania          | 203.0x          | 4.765            | Human/Stool | Hospital patient | 5,134          | NCBI:txid622     |
| 20     | GCA_002949345.1 |                       | Tanzania          | 104.0x          | 4.613            | Human/Stool | Hospital patient | 4,597          | NCBI:txid622     |
| 21     | GCA_002949555.1 |                       | Tanzania          | 159.0x          | 4.613            | Human/Stool | Hospital patient | 4,597          | NCBI:txid622     |
| 22     | GCA_002949615.1 |                       | Tanzania          | 176.0x          | 4.613            | Human/Stool | Hospital patient | 4,597          | NCBI:txid622     |
| 23     | GCA_002949655.1 |                       | Tanzania          | 70.0x           | 4.49             | Human/Stool | Hospital patient | 4,597          | NCBI:txid622     |

|    |                 |                  |             |              |       |             |                  |       |                 |
|----|-----------------|------------------|-------------|--------------|-------|-------------|------------------|-------|-----------------|
| 24 | GCA_002949675.1 |                  | Tanzania    | 59.0x        | 4.578 | Human/Stool | Hospital patient | 4,863 | NCBI:txid622    |
| 25 | GCA_002949715.1 |                  | Tanzania    | 64.0x        | 4.708 | Human/Stool | Hospital patient | 5,061 | NCBI:txid622    |
| 26 | GCA_002949755.1 |                  | Tanzania    | 202.0x       | 4.452 | Human/Stool | Hospital patient | 4,752 | NCBI:txid622    |
| 27 | GCA_002949775.1 |                  | Tanzania    | 207.0x       | 4.450 | Human/Stool | Hospital patient | 4,703 | NCBI:txid622    |
| 28 | GCA_002949815.1 |                  | Tanzania    | 163.0x       | 4.647 | Human/Stool | Hospital patient | 4,968 | NCBI:txid622    |
| 29 | GCA_002949835.1 |                  | Tanzania    | 222.0x       | 4.562 | Human/Stool | Hospital patient | 4,892 | NCBI:txid622    |
| 30 | GCA_002949855.1 |                  | Tanzania    | 68.0x        | 4.596 | Human/Stool | Hospital patient | 4,881 | NCBI:txid622    |
| 31 | GCA_015475595.1 |                  | Germany     | 170.0x       | 4.406 | Human/Stool | Hospital patient | 4,703 | NCBI:txid622    |
| 32 | GCA_000012025.1 | <i>S. boydii</i> | China       | Not provided | 4.647 | Human/Stool | Hospital patient | 4,768 | NCBI:txid300268 |
| 33 | GCA_000020185.1 |                  | USA         | Not provided | 4.875 | Human/Stool | Hospital patient | 5,129 | NCBI:txid344609 |
| 34 | GCA_001027225.1 |                  | South Korea | 77.0x        | 4.574 | Human/Stool | Hospital patient | 4,666 | NCBI:txid621    |
| 35 | GCA_002949175.1 |                  | Tanzania    | 61.0x        | 4.726 | Human/Stool | Hospital patient | 4,956 | NCBI:txid621    |
| 36 | GCA_002949475.1 |                  | Tanzania    | 152.0x       | 4.887 | Human/Stool | Hospital patient | 5,083 | NCBI:txid621    |
| 37 | GCA_002949535.1 |                  | Tanzania    | 108.0x       | 4.703 | Human/Stool | Hospital patient | 4,925 | NCBI:txid621    |
| 38 | GCA_002950275.1 |                  | Tanzania    | 149.0x       | 4.802 | Human/Stool | Hospital patient | 5,062 | NCBI:txid621    |
| 39 | GCA_007106565.1 |                  | South Korea | 194.0x       | 4.678 | Human/Stool | Hospital patient | 4,901 | NCBI:txid621    |
| 40 | GCA_013394535.1 |                  | USA         | 27.896x      | 4.833 | Human/Stool | Hospital patient | 5,038 | NCBI:txid621    |
| 41 | GCA_013394555.1 |                  | USA         | 15.67x       | 4.758 | Human/Stool | Hospital patient | 4,845 | NCBI:txid621    |
| 42 | GCA_016726285.1 |                  | USA         | 1158.74x     | 4.549 | Human/Stool | Hospital patient | 4,679 | NCBI:txid621    |
| 43 | GCA_001518855.1 | <i>S. sonnei</i> | China       | 316.02x      | 5.133 | Human/Stool | Hospital patient | 5,230 | NCBI:txid624    |
| 44 | GCA_001558295.2 |                  | USA         | 255.63x      | 4.988 | Human/Stool | Hospital patient | 5,050 | NCBI:txid624    |
| 45 | GCA_013374815.1 |                  | South Korea | 167.19x      | 4.763 | Human/Stool | Hospital patient | 4,600 | NCBI:txid624    |
